# Supplementary material for: Relationship between vaginal and oral microbiome in patients of human papillomavirus (HPV) infection and cervical cancer
Source: Springer Nature journal article supplement (doi:10.1186/s12967-024-05124-8), 2024-04-29

# Cladogram

A

AB  
CC  
HP  
Z

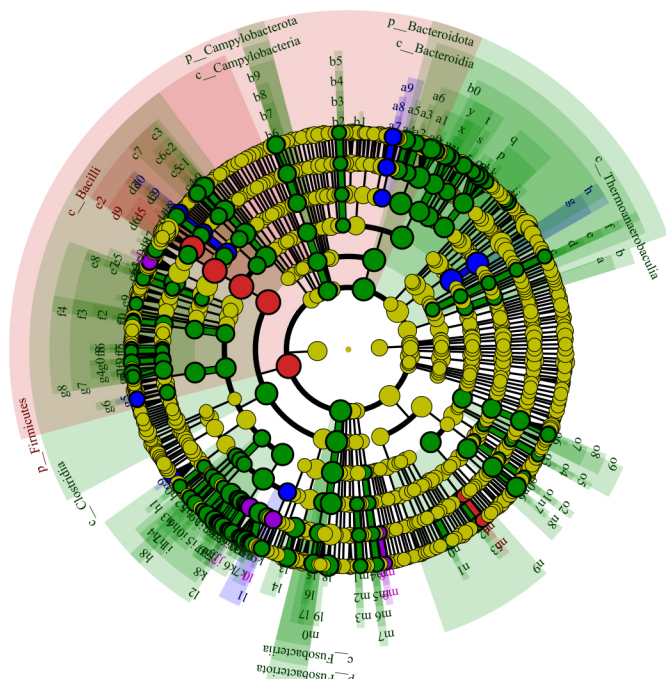

a: f\_Blastocatellaceae  
b: o\_Blastocatellales  
c: s\_unclassified\_Subgroup\_10  
d: g\_Subgroup\_10  
e: f\_Thermoanaerobaculaceae  
f: o\_Thermoanaerobaculales  
g: f\_Bifidobacteriaceae  
h: o\_Bifidobacteriales  
i: s\_Atopobium\_deltae  
j: s\_Atopobium\_vaginae\_PB189\_T1\_4  
k: s\_Bacteroides\_nordii  
l: s\_Bacteroides\_uniformis  
m: s\_Bacteroides\_vulgatus  
n: s\_Phocaeicola\_coprocola  
o: s\_Phocaeicola\_plebeius  
p: g\_Bacteroides  
q: f\_Bacteroidaceae  
r: s\_unclassified\_Porphyrionadaceae\_bacterium\_C941  
s: g\_Porphyrionadaceae\_bacterium\_C941  
t: f\_Muribaculaceae  
u: s\_Porphyrionas\_asaccharolytica  
v: s\_Porphyrionas\_somerae  
w: s\_Porphyrionas\_uconis  
x: g\_Porphyrionas  
y: f\_Porphyrionadaceae  
z: s\_Prevotella\_bergensis  
a0: s\_Prevotella\_colorans  
a1: g\_Prevotella  
a2: s\_Prevotella\_melaninogenica  
a3: g\_Prevotella\_7  
a4: s\_unclassified\_Prevotellaceae\_UCG\_001  
a5: g\_Prevotellaceae\_UCG\_001  
a6: f\_Prevotellaceae  
a7: s\_unclassified\_Rikenellaceae\_RC9\_gut\_group  
a8: g\_Rikenellaceae\_RC9\_gut\_group  
a9: f\_Rikenellaceae  
b0: o\_Bacteroidales  
b1: s\_Terrimonas\_sp\_WWH135  
b2: s\_unclassified\_Microscillaceae  
b3: g\_unclassified\_Microscillaceae  
b4: f\_Microscillaceae  
b5: o\_Cytophagales  
b6: s\_Campylobacter\_ureolyticus

b8: f\_Campylobacteraceae  
b9: o\_Campylobacteriales  
c0: s\_Bacillus\_cereus  
c1: g\_Bacillus  
c2: f\_Bacillaceae  
c3: o\_Bacillales  
c4: s\_Erysipelatoclostridium\_amosum  
c5: g\_Erysipelatoclostridium  
c6: f\_Erysipelatoclostridiaceae  
c7: o\_Erysipelotrichales  
c8: s\_Aerococcus\_christensenii  
c9: g\_Aerococcus  
d0: f\_Aerococcaceae  
d1: g\_Granulicatella\_elegans  
d2: g\_Granulicatella  
d3: f\_Carnobacteriaceae  
d4: s\_Enterococcus\_avium  
d5: g\_Lactobacillus  
d6: g\_Ligilactobacillus  
d7: s\_Lactobacillus\_reuteri  
d8: s\_Limosilactobacillus\_reuteri  
d9: f\_Lactobacillaceae  
e0: s\_Streptococcus\_lutetiensis  
e1: s\_Streptococcus\_mitis  
e2: o\_Lactobacillales  
e3: s\_Mycoplasma\_spermatophilum  
e4: s\_Mycoplasma\_wenyonii  
e5: g\_Mycoplasma  
e6: s\_unclassified\_RF39  
e7: g\_unclassified\_RF39  
e8: f\_unclassified\_RF39  
e9: s\_Clostridiales\_bacterium\_Marseille\_P2846  
f0: s\_Clostridium\_disporicum  
f1: s\_Clostridium\_perfringens  
f2: g\_Clostridium\_sensu\_stricto\_1  
f3: f\_Clostridiales  
f4: o\_Clostridiales  
f5: s\_Eisenbergiella\_massiliensis  
f6: g\_Eisenbergiella  
f7: s\_Frisingicoccus\_caecimuris  
f8: f\_Frisingicoccus  
f9: s\_Hungatella\_hathewayi  
g0: g\_Hungatella

g2: s\_Clostridium\_clostridioforme  
g3: s\_Clostridium\_symbiosum  
g4: g\_Lachnoclostridium  
g5: s\_Lachnospiraceae\_bacterium\_S3MV16  
g6: g\_Moryella  
g7: f\_Lachnospiraceae  
g8: o\_Lachnospirales  
g9: s\_Ruminococcus\_bromii  
h0: s\_Ruthenibacterium\_lactatiformans  
h1: g\_UBA1819  
h2: s\_unclassified\_Eubacterium\_coprostanoligenes\_group  
h3: g\_unclassified\_Eubacterium\_coprostanoligenes\_group  
h4: f\_Eubacterium\_coprostanoligenes\_group  
h5: s\_Peptococcus\_niger  
h6: g\_Peptococcus  
h7: f\_Peptococcaceae  
h8: o\_Peptococcales  
h9: s\_Eubacteriaceae\_bacterium\_NML\_070849  
i0: g\_S5\_A14a  
i1: f\_Anaerovoraaceae  
i2: s\_Anaerococcus\_lactolyticus  
i3: s\_Anaerococcus\_vaginalis  
i4: s\_Chlamydia\_trachomatis  
i5: g\_Anaerococcus  
i6: s\_Bacteroides\_coagulans  
i7: g\_Ezakiella  
i8: s\_Clostridiales\_bacterium\_Marseille\_P2986  
i9: g\_Fenollaria  
j0: s\_Finegoldia\_magna  
j1: g\_Finegoldia  
j2: s\_Helcococcus\_sueciensis  
j3: g\_Helcococcus  
j4: s\_Murdochella\_asaccharolytica  
j5: g\_Murdochella  
j6: s\_Parvimonas\_micra  
j7: g\_Parvimonas  
j8: s\_Clostridiales\_bacterium\_KA00134  
j9: s\_Peptoniphilus\_coxii  
k0: s\_Peptoniphilus\_duerdenii  
k1: s\_Peptoniphilus\_grossensis  
k2: s\_Peptoniphilus\_harei  
k3: s\_Peptoniphilus\_lacrimalis  
k4: s\_Peptoniphilus\_urinmassiliensis

k6: g\_Peptoniphilus  
k7: g\_W5053  
k8: f\_Family\_XI  
k9: s\_Peptostreptococcus\_stomatis  
l0: g\_Peptostreptococcus  
l1: f\_Peptostreptococcaceae  
l2: o\_Peptostreptococcales\_Tissierellales  
l3: s\_Dialister\_propionificiaciens  
l4: g\_Dialister  
l5: s\_Fusobacterium\_gonidiformans  
l6: g\_Fusobacterium  
l7: f\_Fusobacteriaceae  
l8: s\_Sneathia\_vaginalis  
l9: f\_Leptotrichiaceae  
m0: o\_Fusobacteriales  
m1: s\_unclassified\_LWQ8  
m2: g\_unclassified\_LWQ8  
m3: f\_LWQ8  
m4: s\_unclassified\_Gemmataceae  
m5: g\_unclassified\_Gemmataceae  
m6: f\_Gemmataceae  
m7: o\_Gemmatales  
m8: s\_Acetobacter\_persici  
m9: g\_Acetobacter  
n0: s\_unclassified\_Sphingomonadaceae  
n1: g\_unclassified\_Sphingomonadaceae  
n2: s\_Rubrivivax\_gelatinosus  
n3: g\_Ideonella  
n4: s\_Cenchrus\_americanus  
n5: g\_Paucibacter  
n6: s\_Sutterella\_morbirensis  
n7: g\_Sutterella  
n8: f\_Sutterellaceae  
n9: o\_Burkholderiales  
o0: s\_Aeromonas\_caviae  
o1: g\_Aeromonas  
o2: f\_Aeromonadaceae  
o3: s\_Vibrio\_cyctrophilus  
o4: g\_Vibrio  
o5: f\_Vibrionaceae  
o6: s\_Pseudomonas\_brassicarum  
o7: g\_Pseudomonas  
o8: f\_Pseudomonadaceae

B

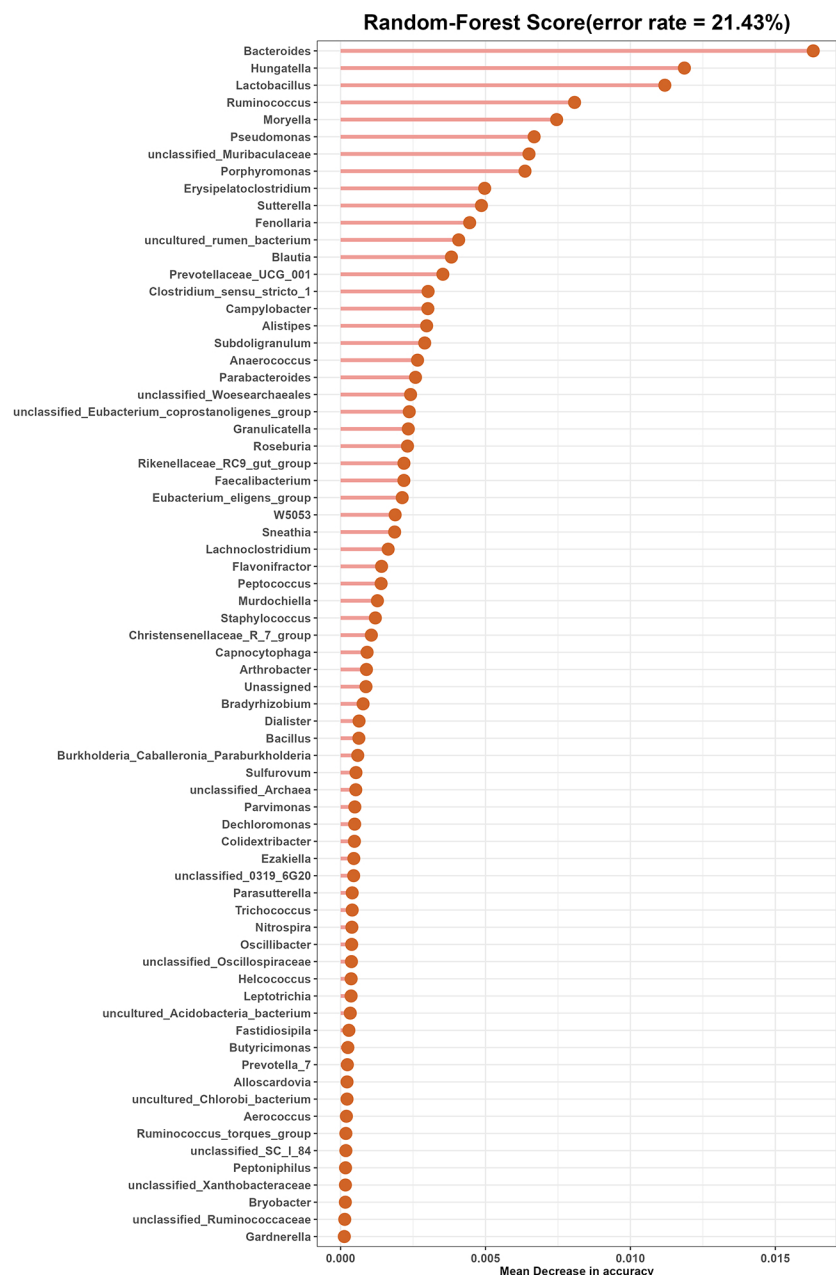

C

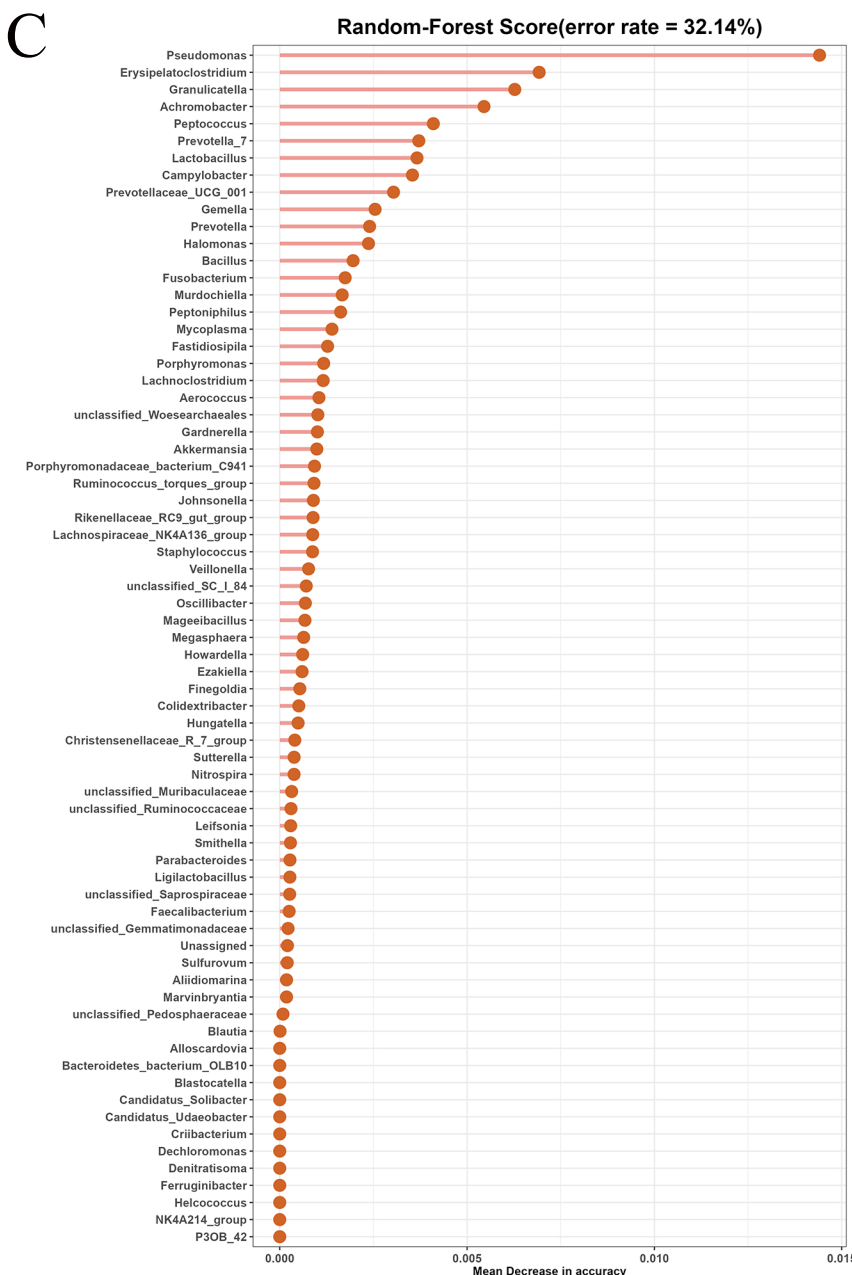

D

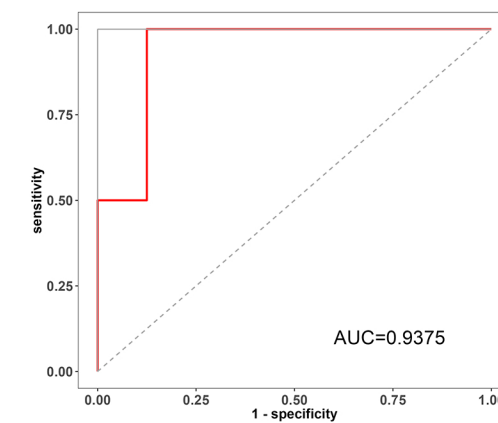

E

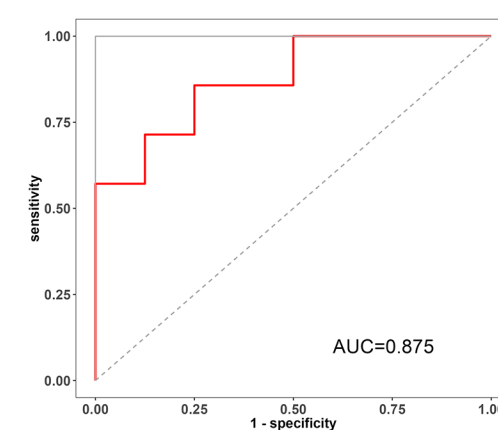

F

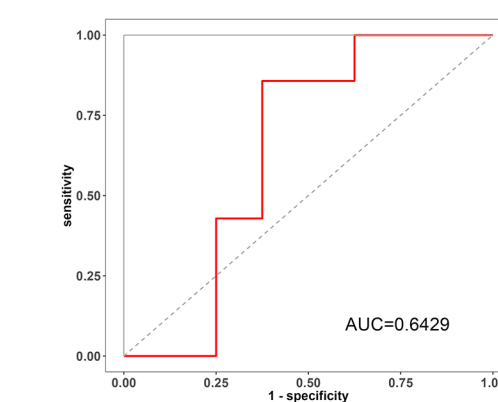

Supplement: MOESM2 [file 27035018]
