# Supplementary material for: Relationship between vaginal and oral microbiome in patients of human papillomavirus (HPV) infection and cervical cancer
Source: Springer Nature journal article supplement (doi:10.1186/s12967-024-05124-8), 2024-04-29

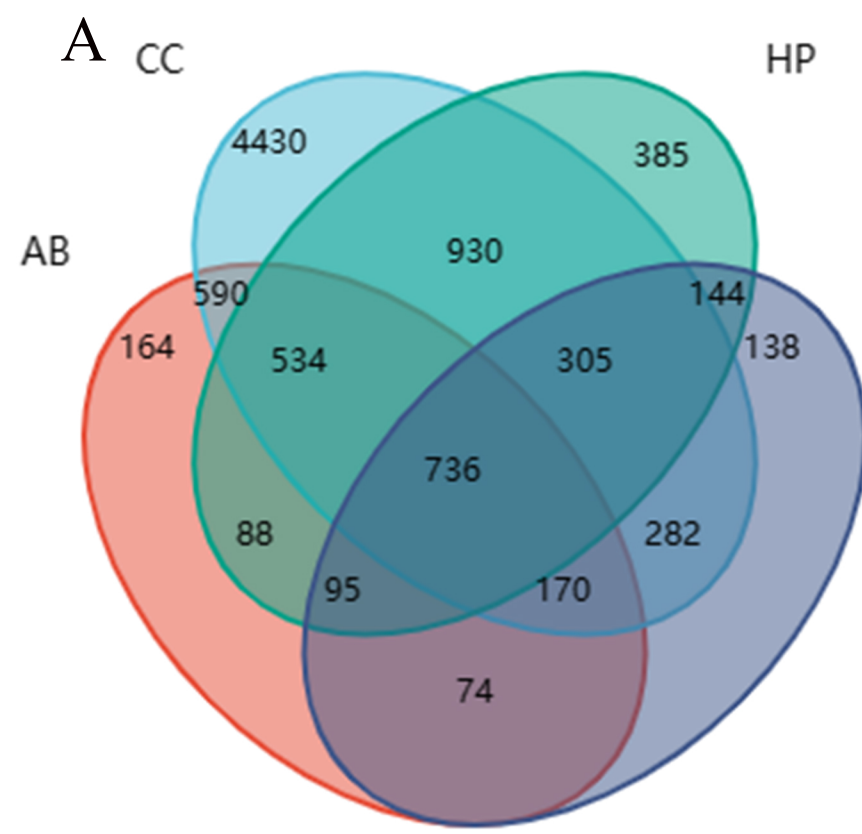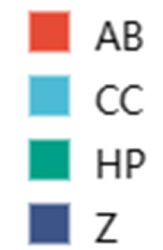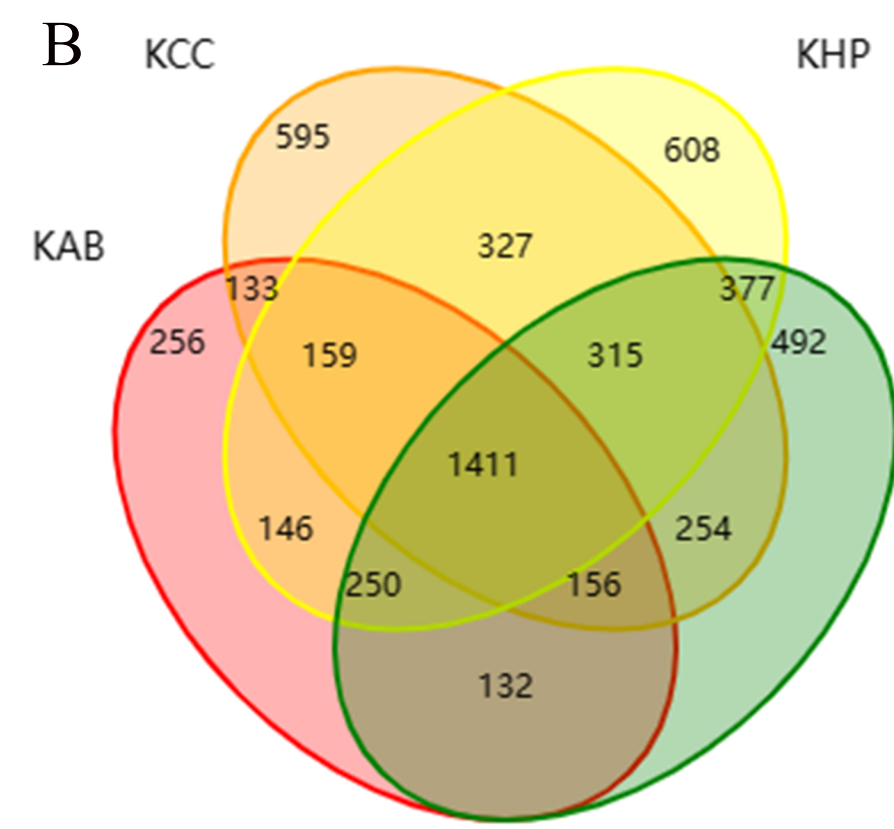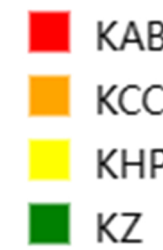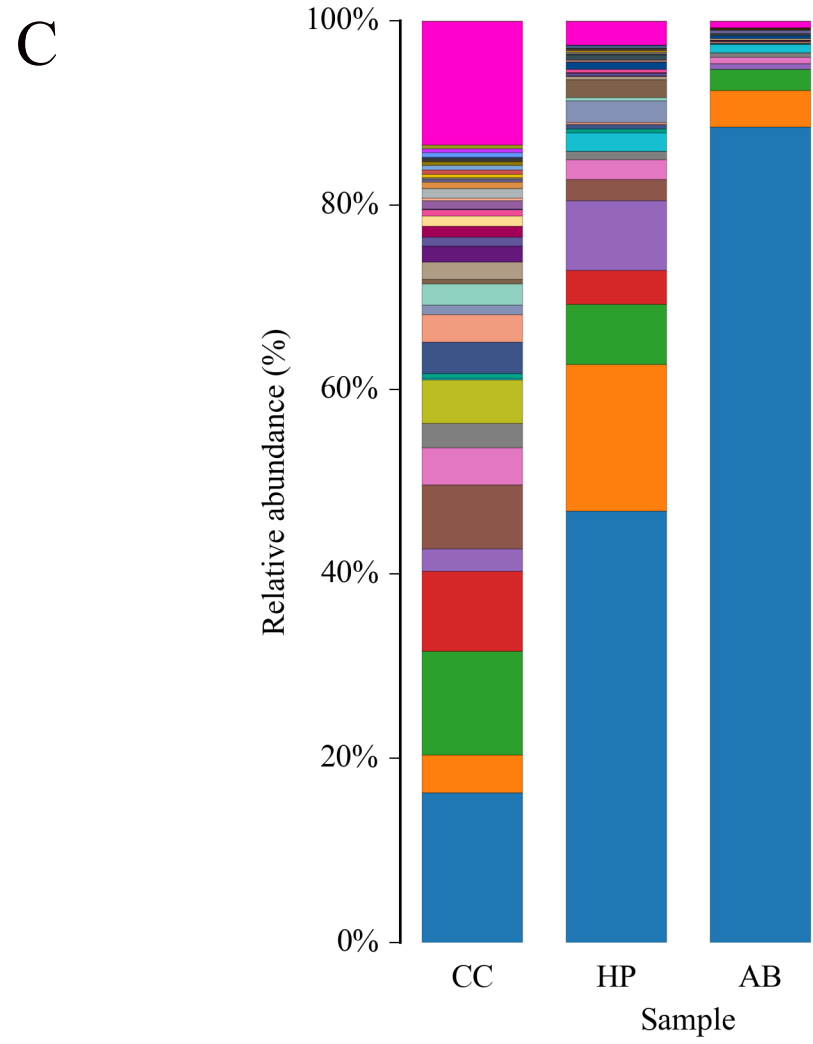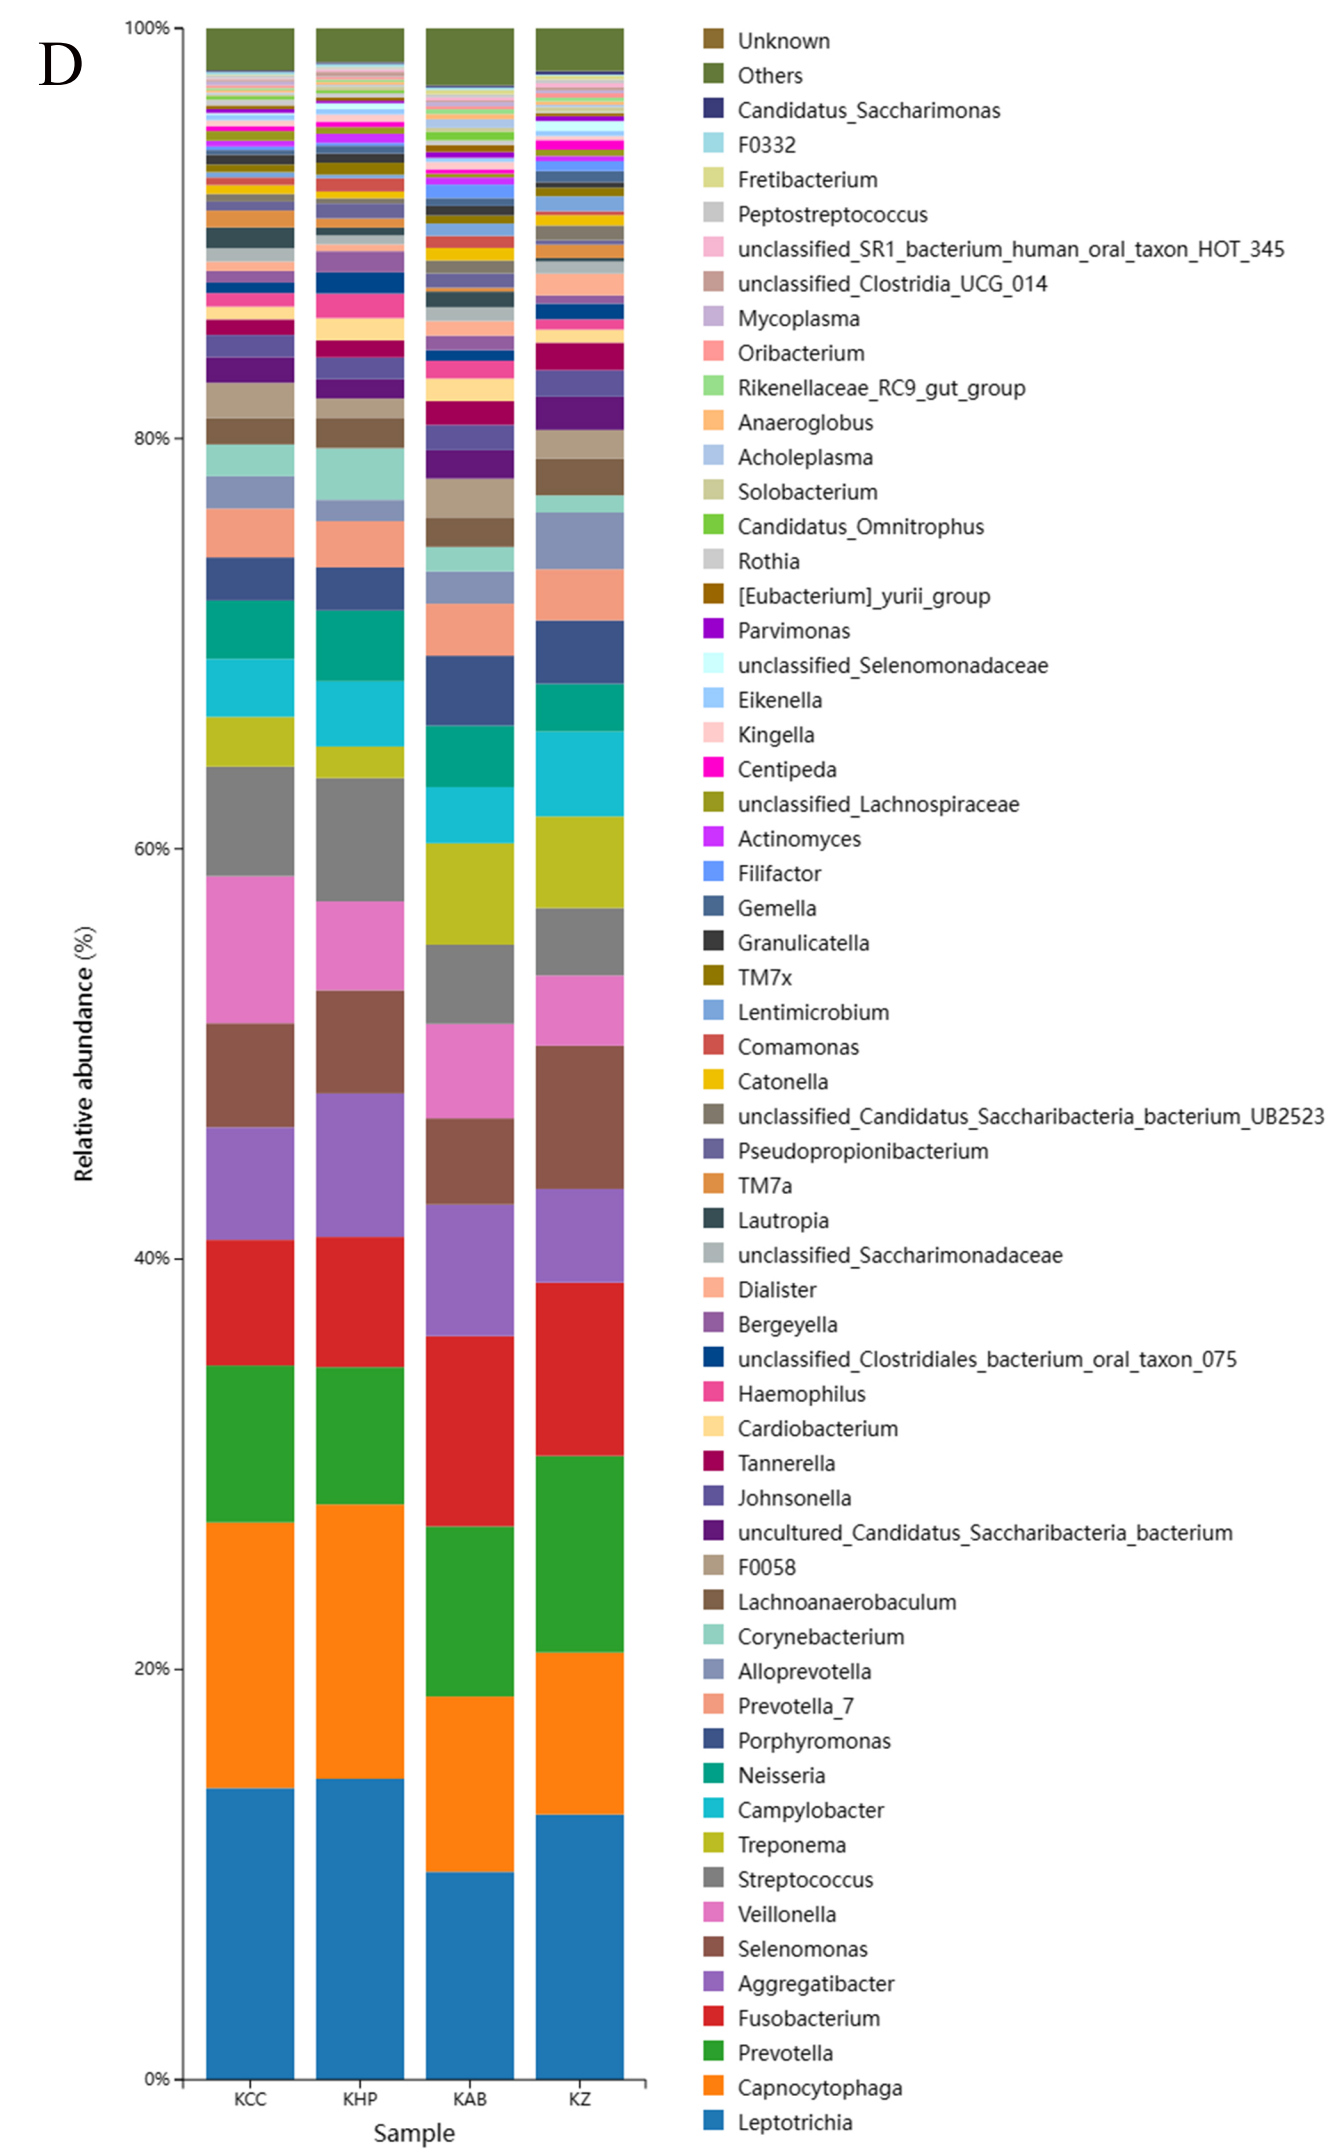

Supplement: MOESM1 [file 27035018]
